# Supplementary material for: Development of Water Repellent, Non-Friable Tannin-Furanic-Fatty Acids Biofoams
Source: MDPI journal article supplement (doi:10.3390/polym14225025), 2022-11-19
Supplement: s1 [file s1]

## SUPPLEMENTARY MATERIAL

### Development of Water Repellent, non-Friable Tannin-Furanic-Fatty Acids Biofoams

Elham Azadeh<sup>1</sup>, Umami Hani Abdullah<sup>2,3\*</sup>, Nurul Basirah Md Ali<sup>2</sup>, Antonio Pizzi<sup>1,4\*</sup>, Christine Gerardin-Charbonnier<sup>1</sup>, Philippe Gerardin<sup>1</sup>, Wan Sarah Samiun<sup>5</sup> and Siti Efliza Ashari<sup>5</sup>

**Table S1.** Characterization of oil-grafted tannin with oleoyl chloride by MALDI-TOF

| Molecules                                                                                                                                                                                  | Peak Experimental | Peak Calculated |
|--------------------------------------------------------------------------------------------------------------------------------------------------------------------------------------------|-------------------|-----------------|
| Fisetinidin-oleate + Na <sup>+</sup><br>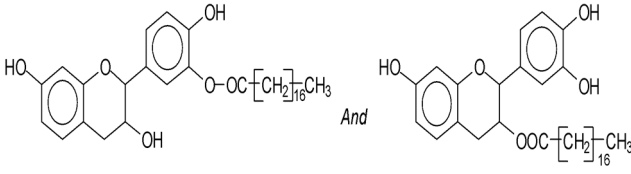                                                                  | 561 Da            | 561 Da          |
| Robinetinidin-oleate, OR<br>robinetinidin-robinetinidin dimer, no Na <sup>+</sup> ,<br>deprotonated<br> | 575-577 Da        | 575-577 Da      |
| Fisetinidin- (oleate) <sub>2</sub> no Na <sup>+</sup><br>                                               | 801 Da            | 801 Da          |
| Robinetinidin- (oleate) <sub>2</sub> with Na <sup>+</sup><br>                                           | 841 Da            | 841 Da          |
| (robinetinidin) <sub>2</sub> -galocatechin trimer, no Na <sup>+</sup>                                                                                                                      | 879-881 Da        | 881 Da          |
| (galocatechin) <sub>2</sub> -robinetinidin trimer, no Na <sup>+</sup>                                                                                                                      | 895 Da            | 895 Da          |
| galocatechin) <sub>2</sub> -robinetinidin trimer, with Na <sup>+</sup>                                                                                                                     | 909 Da            | 910 Da          |
| Robinetinidin-(oleate) <sub>3</sub> with Na <sup>+</sup>                                                                                                                                   | 1105 Da           | 1105 Da         |

|                                                                                   |                                                            |                    |
|-----------------------------------------------------------------------------------|------------------------------------------------------------|--------------------|
| 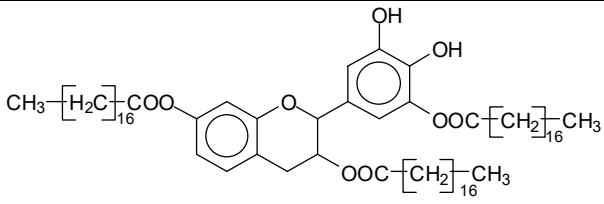 |                                                            |                    |
| robinetinidin-gallocatechin-(oleate) <sub>2</sub> no Na <sup>+</sup> , protonated | 1149 Da                                                    | 1146 Da            |
| fisetinidin-(oleate) <sub>4</sub> , protonated                                    | 1331 Da no Na <sup>+</sup><br>1355 Da with Na <sup>+</sup> | 1330 Da<br>1354 Da |
| (fisetinidin) <sub>2</sub> -(oleate) <sub>3</sub> no Na <sup>+</sup>              | 1338 Da                                                    | 1338 Da            |
|  |                                                            |                    |
| glucose-(fisetinidin) <sub>2</sub> -(oleate) <sub>3</sub> , no Na <sup>+</sup>    | 1500 Da no Na <sup>+</sup>                                 | 1500 Da            |
| (fisetinidin) <sub>2</sub> -(oleate) <sub>4</sub>                                 | 1601 Da no Na <sup>+</sup>                                 | 1601 Da            |
| robinetinidin-(oleate) <sub>5</sub> , deprotonated                                | 1609 Da no Na <sup>+</sup><br>1630 Da with Na <sup>+</sup> | 1609 Da<br>1631 Da |
| (gallocatechin) <sub>2</sub> -(oleate) <sub>4</sub> , deprotonated                | 1688 Da with Na <sup>+</sup>                               | 1688 Da            |

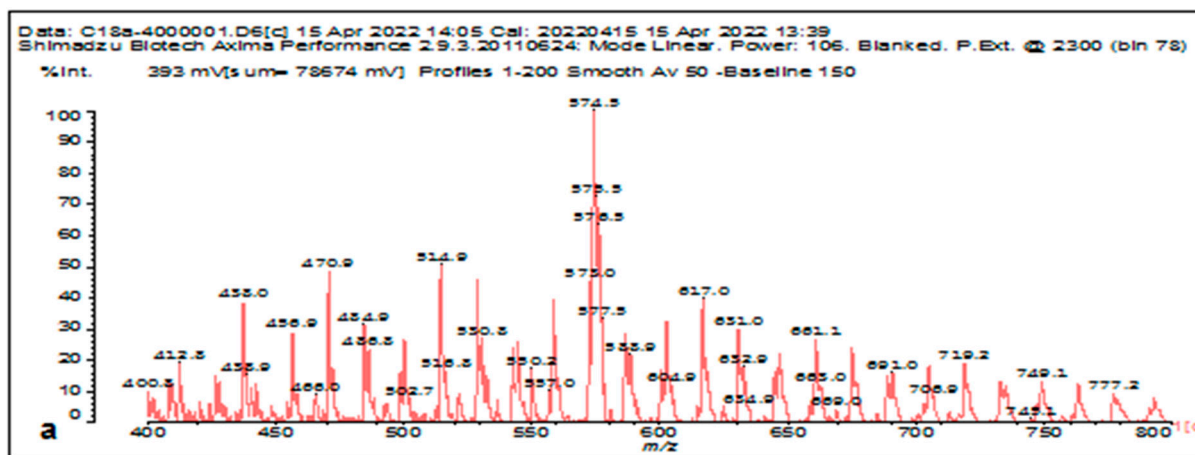

a

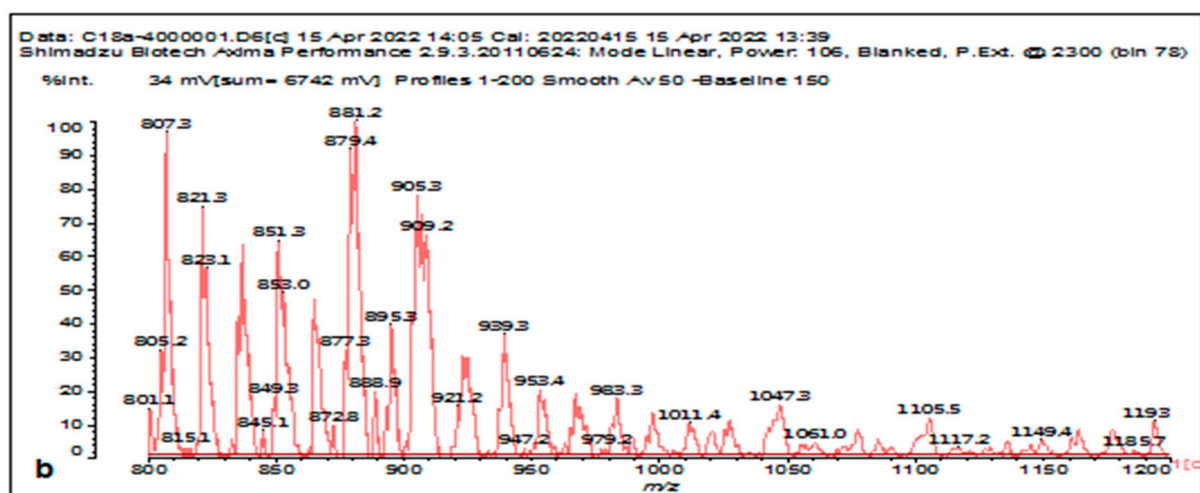

**b**

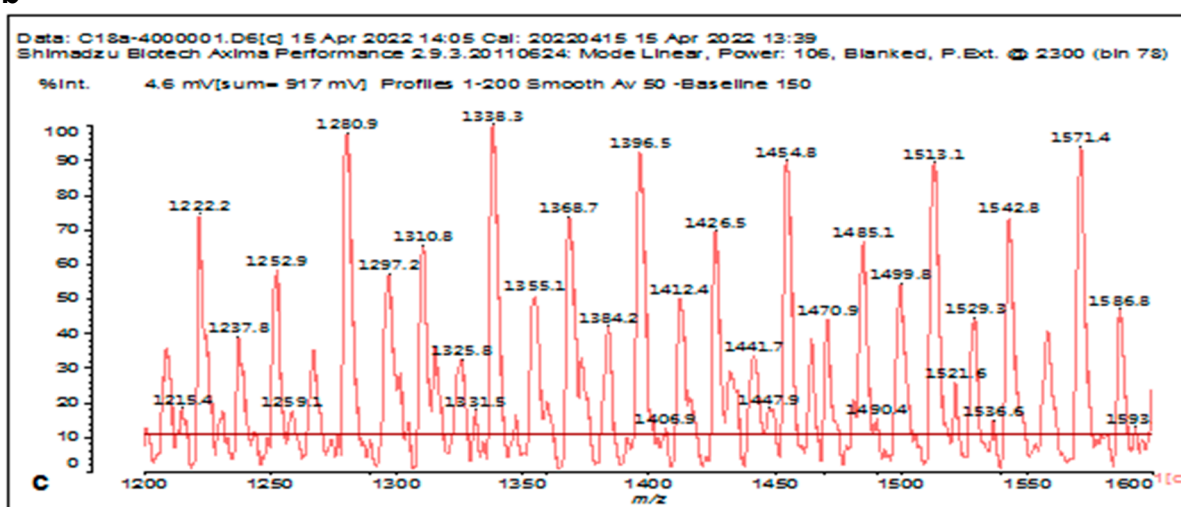

**c**

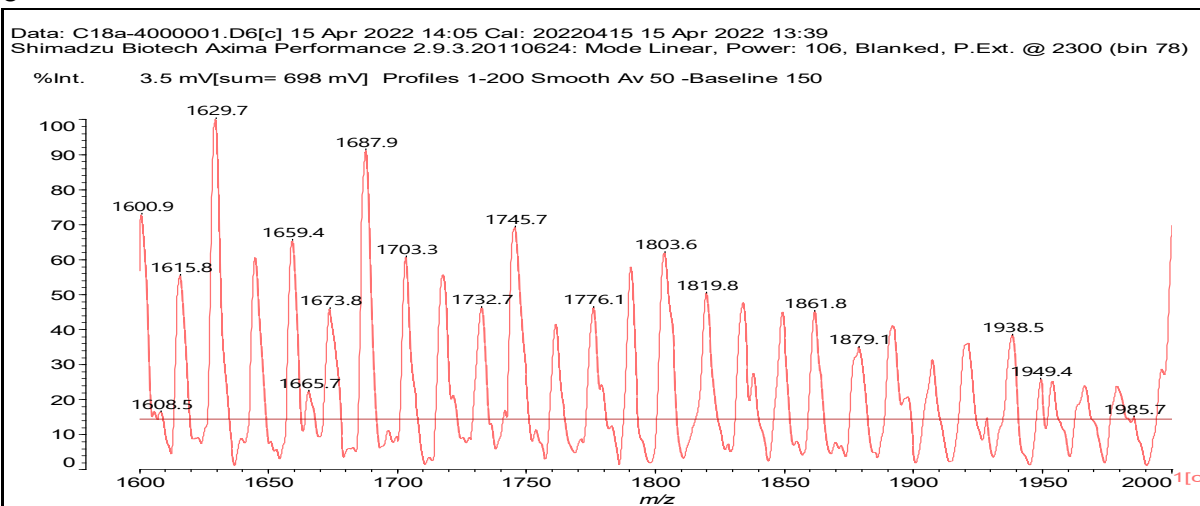

**d**

**Figure S1.** MALDI-TOF mass spectrum of oil-grafted tannin with oleoyl chloride (a) from 400 Da to 800 Da, (b) from 800 Da to 1200Da,(c) from 1200 Da to 1600 Da , (d)from 1600 Da to 2400 Da

**Table S2.** Characterization of oil-grafted tannin with lauryl chloride by MALDI-TOF

| Molecules                                                                                                                                      | Peak Experimental                  | Peak Calculated |
|------------------------------------------------------------------------------------------------------------------------------------------------|------------------------------------|-----------------|
| <p>Fisetinidin-laurate, protonated</p> 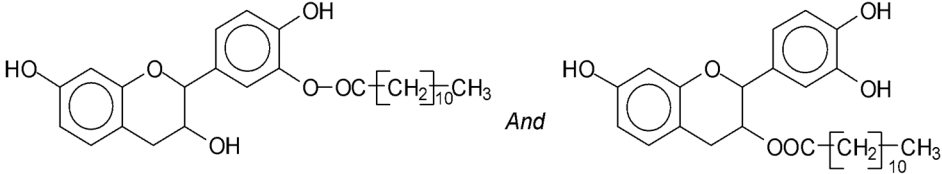                        | 457 Da no Na <sup>+</sup>          | 457 Da          |
| <p>Robinetinidin-laurate</p>                                   | 471 Da no Na <sup>+</sup> OK       | 472 Da          |
| <p>Gallocatechin-laurate</p>                                 | 487 Da no Na <sup>+</sup> OK       | 488 Da          |
| robinetinidin-robinetinidin dimer, deprotonated                                                                                                | 575-577 Da no Na <sup>+</sup>      | 576-577 Da      |
| fisetinidin-robinetinidin, protonated                                                                                                          | 587 Da with Na <sup>+</sup>        | 586 Da          |
| gallocatechin-robinetinidin                                                                                                                    | 617 Da with Na <sup>+</sup>        | 617 Da          |
| (gallocatechin) <sub>2</sub>                                                                                                                   | 633 Da with Na <sup>+</sup>        | 633 Da          |
| <p>Fisetinidin-(laurate)<sub>2</sub> + Na<sup>+</sup></p>    | 661 Da with Na <sup>+</sup>        | 661 Da          |
| <p>Robinetinidin-(laurate)<sub>2</sub> + Na<sup>+</sup></p>  | 675-677 Da with Na <sup>+</sup> OK | 677 Da          |
| Gallocatechin-(laurate) <sub>2</sub> + Na <sup>+</sup>                                                                                         | 691 Da with Na <sup>+</sup> OK     | 691 Da          |

|                                                                                                                                                                                                                                                                                                                                                                                                                                                                                                                                                                                                                                                                                                                                                                                                                                                                                                                                                                                                                                                                                                                                                                                                                                                                                                                                                                                                                                                                                                                                                                                                                                                                                                                                                                                                                                                                                                                                                                                                                                                                                                                                                                                                                                                                                                                                                                  |                                                                                                                                                                                                                                                                                                                                                                                                                                                                                                                                                                                                                                                                                                                                                                                                                                                                                                                                                                                                                                                                                                                                                                                                                                                                                                                             |                                                                                                                                                                                                                                                                                                                                                                                                                                                                                                                                                                                                                                    |
|------------------------------------------------------------------------------------------------------------------------------------------------------------------------------------------------------------------------------------------------------------------------------------------------------------------------------------------------------------------------------------------------------------------------------------------------------------------------------------------------------------------------------------------------------------------------------------------------------------------------------------------------------------------------------------------------------------------------------------------------------------------------------------------------------------------------------------------------------------------------------------------------------------------------------------------------------------------------------------------------------------------------------------------------------------------------------------------------------------------------------------------------------------------------------------------------------------------------------------------------------------------------------------------------------------------------------------------------------------------------------------------------------------------------------------------------------------------------------------------------------------------------------------------------------------------------------------------------------------------------------------------------------------------------------------------------------------------------------------------------------------------------------------------------------------------------------------------------------------------------------------------------------------------------------------------------------------------------------------------------------------------------------------------------------------------------------------------------------------------------------------------------------------------------------------------------------------------------------------------------------------------------------------------------------------------------------------------------------------------|-----------------------------------------------------------------------------------------------------------------------------------------------------------------------------------------------------------------------------------------------------------------------------------------------------------------------------------------------------------------------------------------------------------------------------------------------------------------------------------------------------------------------------------------------------------------------------------------------------------------------------------------------------------------------------------------------------------------------------------------------------------------------------------------------------------------------------------------------------------------------------------------------------------------------------------------------------------------------------------------------------------------------------------------------------------------------------------------------------------------------------------------------------------------------------------------------------------------------------------------------------------------------------------------------------------------------------|------------------------------------------------------------------------------------------------------------------------------------------------------------------------------------------------------------------------------------------------------------------------------------------------------------------------------------------------------------------------------------------------------------------------------------------------------------------------------------------------------------------------------------------------------------------------------------------------------------------------------------|
| 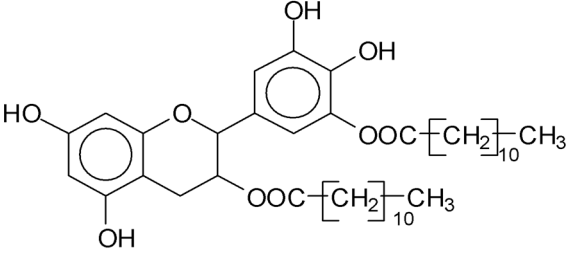                                                                                                                                                                                                                                                                                                                                                                                                                                                                                                                                                                                                                                                                                                                                                                                                                                                                                                                                                                                                                                                                                                                                                                                                                                                                                                                                                                                                                                                                                                                                                                                                                                                                                                                                                                                                                                                                                                                                                                                                                                                                                                                                                                                                                                                                                 |                                                                                                                                                                                                                                                                                                                                                                                                                                                                                                                                                                                                                                                                                                                                                                                                                                                                                                                                                                                                                                                                                                                                                                                                                                                                                                                             |                                                                                                                                                                                                                                                                                                                                                                                                                                                                                                                                                                                                                                    |
| <p>(fisetinidin)<sub>2</sub>-laurate</p>                                                                                                                                                                                                                                                                                                                                                                                                                                                                                                                                                                                                                                                                                                                                                                                                                                                                                                                                                                                                                                                                                                                                                                                                                                                                                                                                                                                                                                                                                                                                                                                                                                                                                                                                                                                                                                                                                                                                                                                                                                                                                                                                                                                                                                        | 747 Da with Na <sup>+</sup>                                                                                                                                                                                                                                                                                                                                                                                                                                                                                                                                                                                                                                                                                                                                                                                                                                                                                                                                                                                                                                                                                                                                                                                                                                                                                                 | 750                                                                                                                                                                                                                                                                                                                                                                                                                                                                                                                                                                                                                                |
| <ul style="list-style-type: none"> <li>- (robinetinidin)<sub>2</sub>-laurate, protonated</li> <li>- robinetinidin-galocatechin-laurate, protonated</li> <li>- (galocatechin)<sub>2</sub>-laurate</li> <li>-(robinetinidin)<sub>2</sub>-galocatechin trimer, deprotonated</li> <li>- (galocatechin)<sub>2</sub>-robinetinidin trimer, no Na<sup>+</sup>, deprotonated</li> <li>- fisetinidin-robinetinidin-(laurate)<sub>2</sub></li> <li>- robinetinidin-galocatechin-(laurate)<sub>2</sub></li> <li>- (galocatechin)<sub>2</sub>-(laurate)<sub>2</sub></li> <li>- glucose-(robinetinidin)<sub>2</sub>-fisetinidin</li> <li>- galocatechin-robinetinidin-(laurate)<sub>3</sub></li> <li>- (galocatechin)<sub>2</sub>-(laurate)<sub>3</sub></li> <li>- Glucose-(robinetinidin)<sub>2</sub>-fisetinidin-laurate</li> <li>- (fisetinidin)<sub>2</sub>-robinetinidin-(laurate)<sub>2</sub></li> <li>- (robinetinidin)<sub>2</sub>-fisetinidin-(laurate)<sub>2</sub></li> <li>- (robinetinidin)<sub>3</sub>-(laurate)<sub>2</sub> with Na<sup>+</sup></li> <li>- (robinetinidin)<sub>2</sub>-galocatechin-(laurate)<sub>2</sub></li> <li>- fisetinidin-robinetinidin-(laurate)<sub>4</sub></li> <li>- (galocatechin)<sub>2</sub>-(laurate)<sub>4</sub></li> <li>- (galocatechin)<sub>2</sub>-(laurate)<sub>4</sub></li> <li>- galocatechin-robinetinidin-(laurate)<sub>4</sub></li> <li>- Glucose-(robinetinidin)<sub>2</sub>-fisetinidin-(laurate)<sub>2</sub></li> <li>- (robinetinidin)<sub>2</sub>-fisetinidin-(laurate)<sub>3</sub></li> <li>- (robinetinidin)<sub>3</sub>-(laurate)<sub>3</sub></li> <li>- (robinetinidin)<sub>2</sub>-galocatechin-(laurate)<sub>3</sub></li> <li>- robinetinidin-(galocatechin)<sub>2</sub>-(laurate)<sub>3</sub></li> <li>- fisetinidin-robinetinidin-(laurate)<sub>5</sub></li> <li>- robinetnidin-galocatechin-(laurate)<sub>5</sub></li> <li>- (galocatechin)<sub>2</sub>-(laurate)<sub>5</sub></li> <li>- Glucose-(robinetinidin)<sub>2</sub>-fisetinidin-(laurate)<sub>3</sub></li> <li>- fisetinidin-robinetinidin-(laurate)<sub>6</sub></li> <li>- robinetnidin-galocatechin-(laurate)<sub>5</sub></li> <li>- (galocatechin)<sub>2</sub>-(laurate)<sub>6</sub></li> <li>- Glucose-(robinetinidin)<sub>2</sub>-fisetinidin-(laurate)<sub>4</sub></li> <li>- fisetinidin-robinetinidin-(laurate)<sub>7</sub></li> </ul> | <ul style="list-style-type: none"> <li>761 Da no Na<sup>+</sup></li> <li>777 Da no Na<sup>+</sup></li> <li>815 Da with Na<sup>+</sup></li> <li>879 Da no Na<sup>+</sup></li> <li>895 Da no Na<sup>+</sup></li> <li>949-953 Da with Na<sup>+</sup></li> <li>981 Da with Na<sup>+</sup></li> <li>997 Da with Na<sup>+</sup></li> <li>1011 Da, no Na<sup>+</sup></li> <li>1163 Da with Na<sup>+</sup></li> <li>1179 Da with Na<sup>+</sup></li> <li>1193 Da no Na<sup>+</sup></li> <li>1221 Da with Na<sup>+</sup></li> <li>1237 Da with Na<sup>+</sup></li> <li>1253 Da with Na<sup>+</sup></li> <li>1269 Da with Na<sup>+</sup></li> <li>1317 Da with Na<sup>+</sup></li> <li>1338 Da no Na<sup>+</sup></li> <li>1361 Da with Na<sup>+</sup></li> <li>1344 Da with Na<sup>+</sup></li> <li>1375 Da no Na<sup>+</sup></li> <li>1419 Da with Na<sup>+</sup></li> <li>1435 Da with Na<sup>+</sup></li> <li>1451 Da with Na<sup>+</sup></li> <li>1467 Da with Na<sup>+</sup></li> <li>1499 Da with Na<sup>+</sup></li> <li>1526 Da with Na<sup>+</sup></li> <li>1543 Da with Na<sup>+</sup></li> <li>1557 Da no Na<sup>+</sup></li> <li>1681 Da with Na<sup>+</sup></li> <li>1708 Da with Na<sup>+</sup></li> <li>1724 Da with Na<sup>+</sup></li> <li>1740 Da no Na<sup>+</sup></li> <li>1863 Da with Na<sup>+</sup></li> </ul> | <ul style="list-style-type: none"> <li>760 Da</li> <li>776 Da</li> <li>815 Da</li> <li>880 Da</li> <li>896 Da</li> <li>949 Da</li> <li>981 Da</li> <li>997 Da</li> <li>1011 Da</li> <li>1163 Da</li> <li>1179 Da</li> <li>1193 Da</li> <li>1221 Da</li> <li>1237 Da</li> <li>1253 Da</li> <li>1269 Da</li> <li>1317 Da</li> <li>1338 Da</li> <li>1361 Da</li> <li>1344 Da</li> <li>1375 Da</li> <li>1419 Da</li> <li>1435 Da</li> <li>1451 Da</li> <li>1467 Da</li> <li>1499 Da</li> <li>1526 Da</li> <li>1543 Da</li> <li>1557 Da</li> <li>1681 Da</li> <li>1708 Da</li> <li>1724 Da</li> <li>1740 Da</li> <li>1863 Da</li> </ul> |

|                                                                            |                              |         |
|----------------------------------------------------------------------------|------------------------------|---------|
| - robinetnidin-galocatechin-(laurate) <sub>6</sub>                         | 1890 Da with Na <sup>+</sup> | 1890 Da |
| - (galocatechin) <sub>2</sub> -(laurate) <sub>7</sub>                      | 1906 Da with Na <sup>+</sup> | 1906 Da |
| - Glucose-(robinetinidin) <sub>2</sub> -fisetinidin-(laurate) <sub>5</sub> | 1922 Da no Na <sup>+</sup>   | 1922 Da |
| - Glucose-(robinetinidin) <sub>2</sub> -fisetinidin-(laurate) <sub>6</sub> | 2014 Da no Na <sup>+</sup>   | 2014 Da |
| - (robinetinidin) <sub>2</sub> -(laurate) <sub>7</sub> , protonated        | 2036 Da no Na <sup>+</sup>   | 2035 Da |
| - robinetnidin-galocatechin-(laurate) <sub>7</sub>                         | 2057 Da no Na <sup>+</sup>   | 2057 Da |
| - galocatechin-robinetinidin-(laurate) <sub>7</sub>                        | 2072 Da with Na <sup>+</sup> | 2072 Da |
| - (galocatechin) <sub>2</sub> -(laurate) <sub>8</sub> , deprotonated       | 2089 Da with Na <sup>+</sup> | 2089 Da |
| - galocatechin-robinetinidin-(laurate) <sub>8</sub>                        | 2254 Da with Na <sup>+</sup> | 2254 Da |
| - Glucose-(robinetinidin) <sub>2</sub> -fisetinidin-(laurate) <sub>7</sub> | 2286 Da no Na <sup>+</sup>   | 2286 Da |
| - (galocatechin) <sub>2</sub> -(laurate) <sub>9</sub> , deprotonated,      | 2271 Da with Na <sup>+</sup> | 2073 Da |
| - Glucose-(robinetinidin) <sub>2</sub> -fisetinidin-(laurate) <sub>8</sub> | 2468 Da no Na <sup>+</sup>   | 2468 Da |

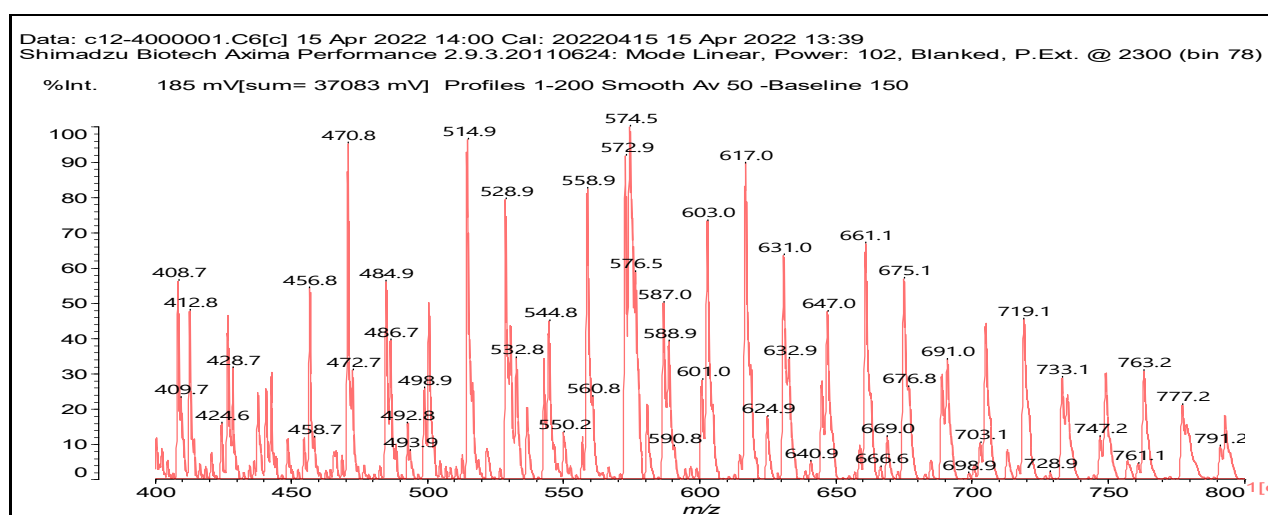

**a**

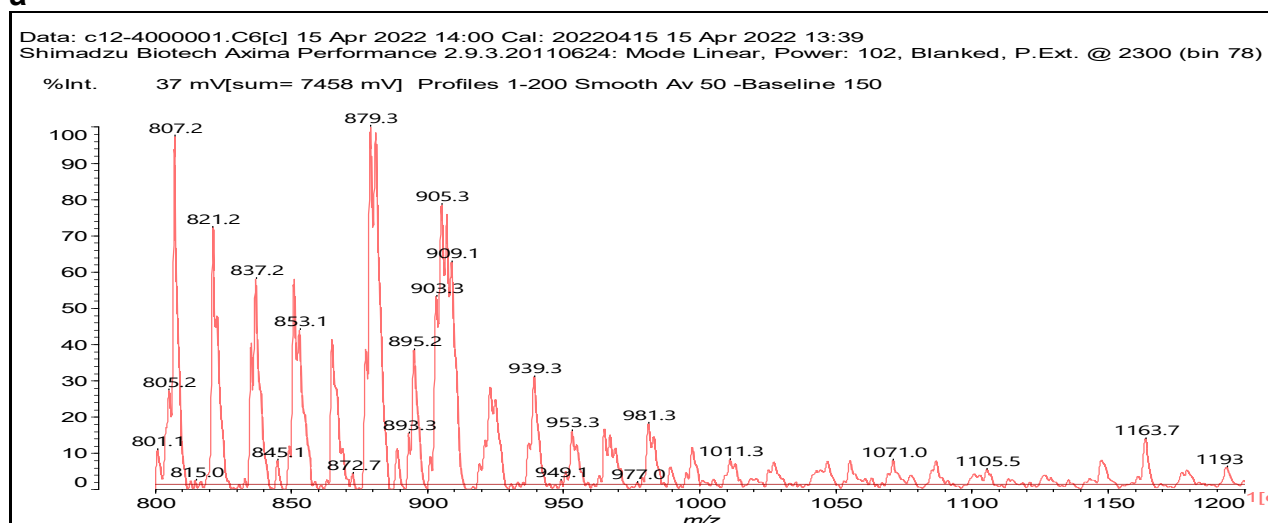

**b**

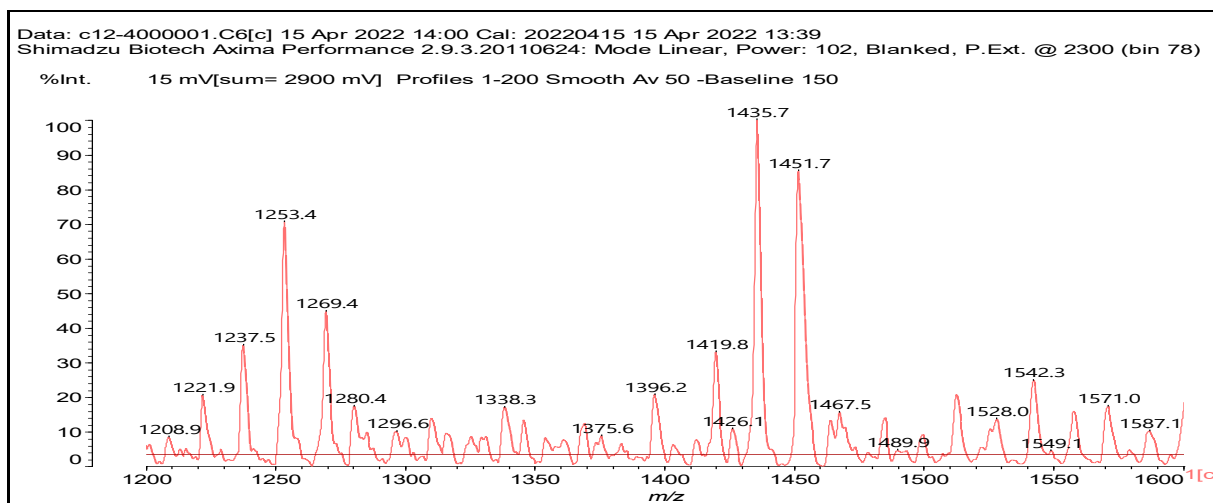

c

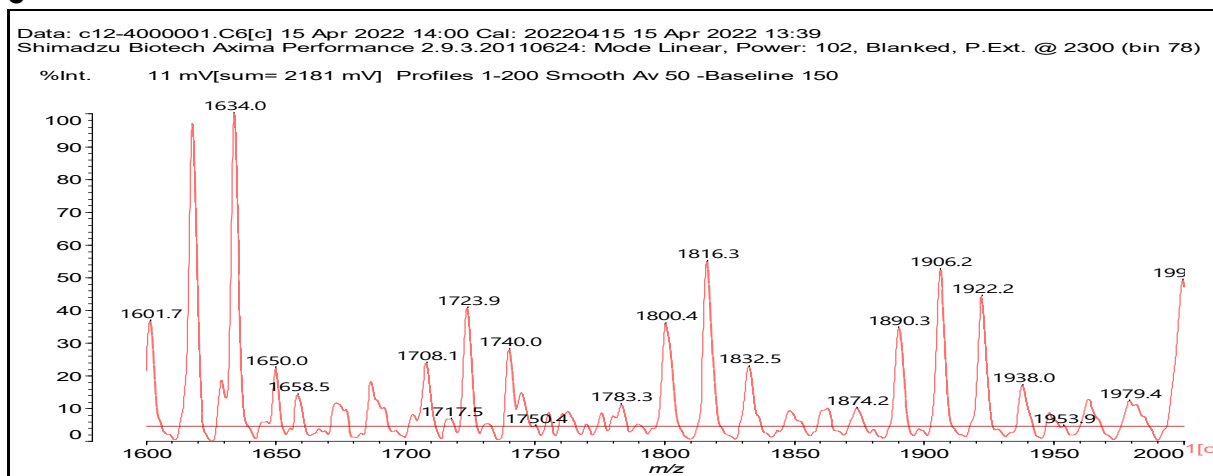

d

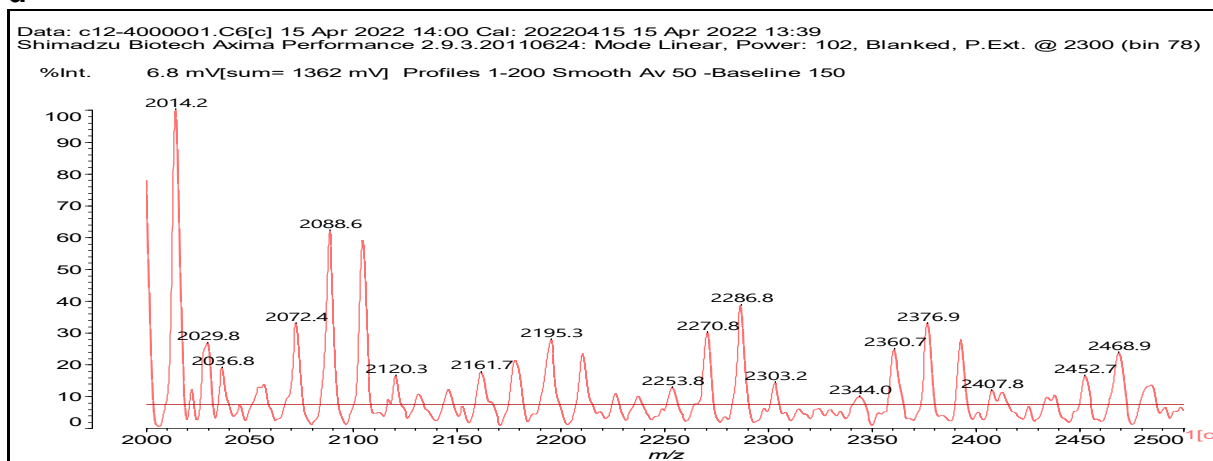

e

**Figure S2.** MALDI-TOF mass spectrum of oil-grafted tannin with lauryl chloride (a) from 400 Da to 800 Da, (b) from 800 Da to 1200 Da, (c) from 1200 Da to 1600 Da, (d) from 1600 Da to 2000 Da, (e) from 2000 Da to 2500 Da
